# Supplementary material for: Silicon-based nanopillars: a novel platform for tissue applications
Source: Royal Society of Chemistry journal article supplement (doi:10.1039/d5bm00763a), 2025-01-01
Supplement: d5bm00763a1.pdf [file d5bm00763a1.pdf]

## SUPPLEMENTARY MATERIALS

The supplementary materials (figures and tables) are provided below and as an independent file (PDF), along with their corresponding legend directly below the figure.

### Figures S1 to S5

#### A Si-NP array

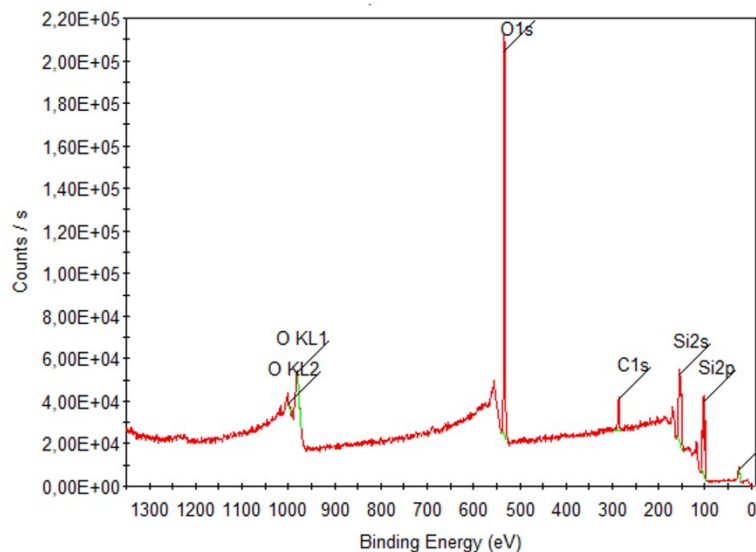

#### B Flat Si surface

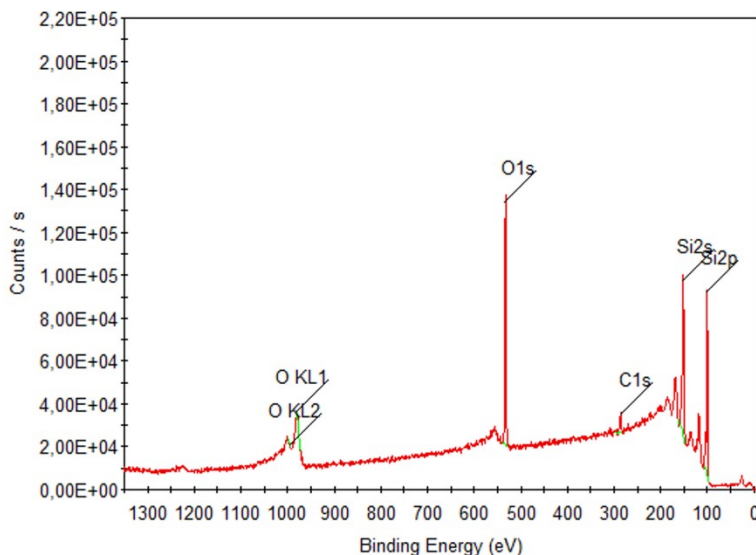

**Fig. S1.** X-ray photoelectron spectroscopy (XPS) graphs showing chemical composition of Si-NP array (A) and flat Si surface (B) wafers. The peaks are identified as silicon (Si), oxygen (O) and carbon (C).

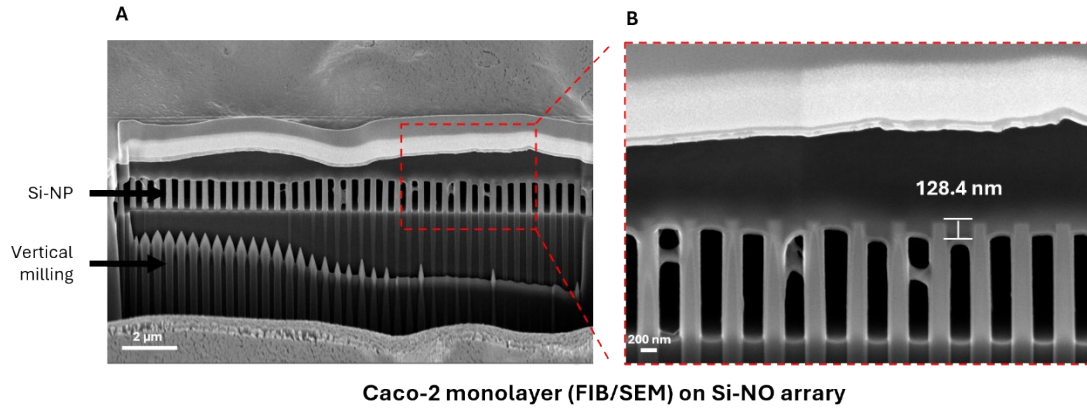

**Fig. S2. Adhesion of human colorectal cancer cells (Caco-2) monolayer on Si-NP arrays.** Representative focused ion beam-scanning electron microscopy (FIB-SEM) image of Caco-2 cells cultured on Si-NP for an extended time (72 h) when a cell monolayer is formed (A). Cross-sectional view highlighting homogeneous short-range vertical envelope at a depth of approximately 130 nm (B).

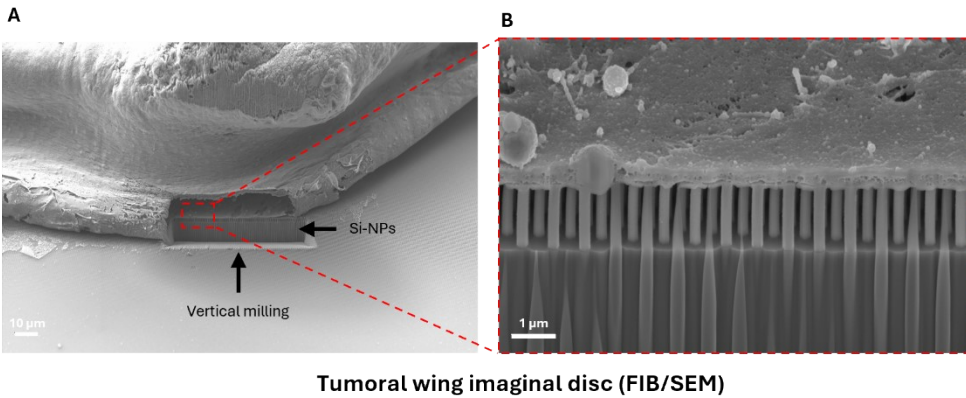

**Fig. S3. Adhesion of *Drosophila* tumoral wing imaginal disc on Si-NP arrays.** Representative focused ion beam-scanning electron microscopy (FIB-SEM) image of adherent tumoral wing imaginal disc (A) provides cross-sectional view (B) highlighting tissue intercalation between nanopillars.

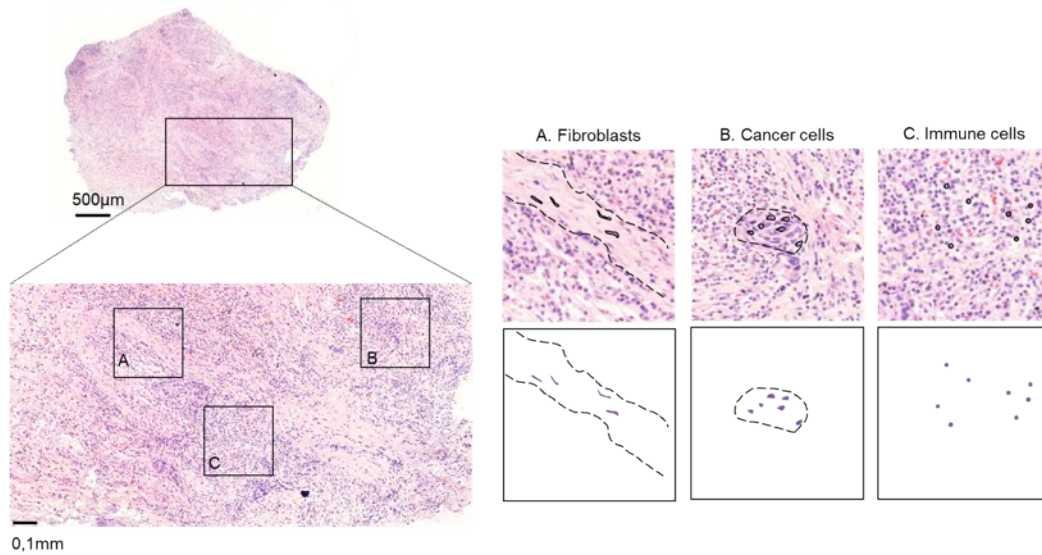

**Fig. S4. Biocompatibility of patient-derived lung tumor biopsies *ex vivo* on Transwell inserts.** Representative histological images of tumor sections cultured under pre-optimized conditions in transwell inserts (Control), stained for Hematoxylin & Eosin (HE) to assess cell density and morphology. High-magnification imaging shows numerous cell types: fibroblasts (A), cancer cells (B) and immune cells (C).

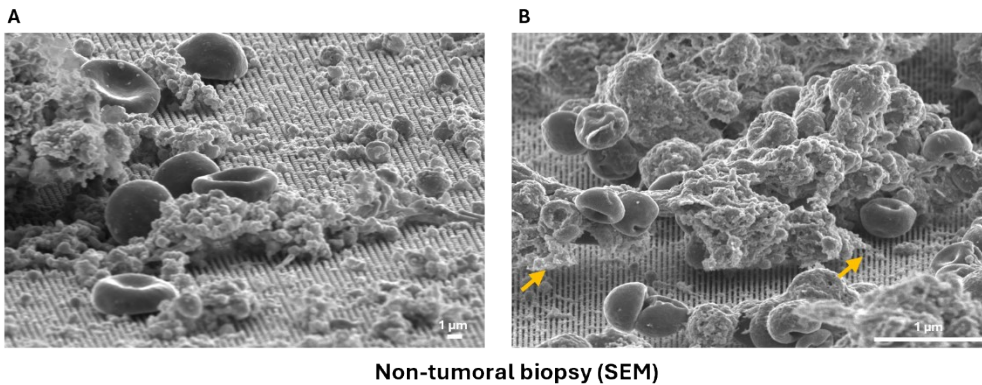

**Non-tumoral biopsy (SEM)**

**Fig. S5. Adhesion of non-tumoral biopsies on Si-NP arrays.** Representative scanning electron microscopy (SEM) image of non-tumor biopsies cultured on Si-NP array (A-B). High-magnification imaging shows few and short filopodia-like structures formed by non-tumor cells on Si-NP arrays (B, yellow arrows).

**Table S1: Summary of patient's clinical data**

| <b>Patient reference</b> | <b>Age (y.o.)</b> | <b>Gender</b> | <b>Histology</b> | <b>Race</b> | <b>Stage (*)</b> | <b>Biopsy sampling location</b> |
|--------------------------|-------------------|---------------|------------------|-------------|------------------|---------------------------------|
| PEX01                    | 67                | F             | ADC              | Caucasian   | IIB              | Tumor core                      |
| PEX02                    | 63                | M             | SCC              | Caucasian   | IIA              | Tumor core                      |
| PEX03                    | 59                | M             | ADC              | Caucasian   | IIB              | Tumor core                      |
| PEX04                    | 63                | M             | ADC              | Caucasian   | IIA              | Tumor core                      |
| PEX05                    | 61                | M             | ADC              | Caucasian   | IIIA             | Tumor core                      |
| PEX06                    | 62                | M             | SCC              | Caucasian   | IIIA             | Tumor core                      |
| PEX07                    | 74                | F             | SCC              | Caucasian   | IA3              | Tumor core                      |
| PEX08                    | 58                | F             | ADC              | Caucasian   | IIB              | Tumor core                      |
| PEX09                    | 60                | M             | SCC              | Caucasian   | IIIA             | Tumor core                      |
| PEX10                    | 77                | M             | SCC              | Caucasian   | IIB              | Tumor core                      |
| PEX11                    | 53                | M             | ADC              | Caucasian   | IA3              | Tumor core                      |

M: male; F: female; ADC: lung adenocarcinoma; SCC: lung squamous cell carcinoma, (\*) stage based on the AJCC 8th edition
